# Supplementary material
Source: PubMed Central journal article supplement (PMC7241367)
Supplement: mmc1.pdf [file mmc1.pdf]

# Covid-19 NHS

Dear colleague,

The objective of this survey is to assess the facilities across the healthcare in United Kingdom and what do the staff think about it in the current Covid-19 situation.

Your participation is highly appreciated.

All of the responses will be confidential.

Many thanks

Muhammad Rafaih Iqbal

SpR General Surgery

\* Required

1. Which region do you work? \*

*Mark only one oval.*

England

Scotland

Wales

Northern Ireland

2. What is your role? \*

*Mark only one oval.*

- Doctor
- Nurse
- Healthcare assistant
- Managerial
- Pharmacist
- Physiotherapist
- Porter
- Other

3. In your daily routine do you have direct patient contact? \*

*Mark only one oval.*

- Yes
- No

4. In the current situation do you feel supported at your trust? \*

*Mark only one oval.*

- Strongly agree
- Agree
- Neither agree nor disagree
- Disagree
- Strongly disagree

5. Do you think there are adequate facilities ( specialist beds, specified isolated areas ) at you trust to treat the corona virus patients? \*

*Mark only one oval.*

- Strongly agree
- Agree
- Neither agree nor disagree
- Disagree
- Strongly disagree

6. Do you think there are enough Personal Protective Equipment (PPE) available at your trust : the frontline staff? \*

*Mark only one oval.*

- Strongly agree
- Agree
- Neither agree nor disagree
- Disagree
- Strongly disagree

7. Do you think there is enough local guidance regarding this pandemic at your trust? \*

*Mark only one oval.*

- Strongly agree
- Agree
- Neither agree nor disagree
- Disagree
- Strongly disagree

8. Do you think that sufficient local training was provided to frontline staff? \*

*Mark only one oval.*

- Strongly agree
- Agree
- Neither agree nor disagree
- Disagree
- Strongly disagree

9. What is your daily source of information regarding this pandemic? \*

*Mark only one oval.*

- Daily hospital emails
- News
- Social media
- Gov.uk
- Friends and family
- Health professionals
- All of the above

10. Do you think that this outbreak has improved your hand washing practice? \*

*Mark only one oval.*

- Strongly agree
- Agree
- Neither agree nor disagree
- Disagree
- Strongly disagree

11. Do you think Britain was well prepared for this pandemic? \*

*Mark only one oval.*

- Strongly agree
- Agree
- Neither agree nor disagree
- Disagree
- Strongly disagree

12. Do you think an earlier lockdown would have helped? \*

*Mark only one oval.*

- Strongly agree
- Agree
- Neither agree nor disagree
- Disagree
- Strongly disagree

13. Would you have recommended to test all frontline staff for coronavirus? \*

*Mark only one oval.*

- Strongly agree
- Agree
- Neither agree nor disagree
- Disagree
- Strongly disagree

---

This content is neither created nor endorsed by Google.

Google Forms
